# Supplementary material for: Quality assessment of a serum and xenofree medium for the expansion of human GMP-grade mesenchymal stromal cells
Source: PeerJ. 2022 May 30;10:e13391. doi: 10.7717/peerj.13391 (PMC9161815; doi:10.7717/peerj.13391)
Supplement: Supplemental Information 1 [file peerj-10-13391-s001.xlsx]

## Sheet: P0 exp
LPC	SVF
1680	3424.24
4887.43	3484.8
1375.45	5397.33
4255.66	10140
2128	118008
4795.74	14344
1414.36	23100
5918.56	3362.93
3628.42	1815
8592.59	15048
2287.06	2266.96
5526.32	3111.14
5123.15	3396.32
5669.57	581.43
3918.37
13282.8
17333.3
8157.89
22620
8232
29400
7980
40180
9600
43366.7
8640
120000
3011.11
95333.3
4285.71
52444.4
28800
7280
2253.52
2072.73
1418.18
1777.5
4760
2823.53
1956
2461.54
2388
5065.71
4384.29
6052.5
5040
2874.67
3265.98
3306.95
3481.74
1570.11

## Sheet: P1 exp
hCPL	FBS
20.81	4.32
17.35	10.16
14.29	5.67
17.45	6.64
17.6	8.9
11	8.7
24.28	5.4
13.8	13.55
18.73	1.62
16.4	7.32
11.25	10.8
8.55	11.03
14.8	10.15
26.73
12.06
15.03	4.72
9.27	6.6
5.4	6.8
19.67	5.94
6.4	8.8
15.75	5.6
11.35	7.1
13.68	11.52
14.25	6.5
16.07	9.86
12.35	11.67
26.25	4.8
7.7	13.91
7.7	14.45
5.25	6.96
13.55	11.96
12.02	20.68
2.94
8.5
10.45
11.15
8.55
6.88
14.8
6.8
8.08
9.84
7
8.88
7.85
9.4
7.1
9.9
8.2
15.9
10.7
8.95
7.55
18.9
15.39
13.41
16.4
6.16
19.3
24.9
8.8
18.9
23.9
6.88
15.4
22.95
13.77
28.08
6.45
7.68
9
17.55
7.41
10
8.3
18.9
7
13.23
29.28
13
29.07
15.35
8.76
21.54
9.24
14.2
10.48
18.36
14.12
20.52
18.45
20.93
21.29
13.01
12.69
20.25
20.75
28.94
20.16
22.3
19.2
24.1
33.76
30.64
27.12
27.48

## Sheet: P2 EXP
hCPL	FBS
16.49	4.88
16.42	7.65
15.73	6.72
13.76	5.04
18.27	11.25
15.61	9.05
18.87	3.95
17.96	8.75
18.86	5.52
21.91	7.95
10.7	9.36
12.33	5.54
17.5	9
13.65
9.81
14.22	5.22
12.4	7.7
5.1	12.2
11.8	9
10	7.03
13.9	5.5
11.9	3.4
11.15	8.68
8.8	4.15
22.75	15.26
9.1	8.87
	10.3
8.8	15.3
8.91	7.65
3.6	9.95
3.24	8.82
12.65	15.68
9.8
7.45
7.1
10.9
5.1
18.4
6.65
8.25
12.2
5.95
16.84
9.8
6.86
10.6
8.54
9.15
14.8
12.7
15.25
4.8
16.07
8.01
5.58
10.43
10.6
14
12.77
9.8
12.8
6.09
7.3
12.6
9
9.2
11.2
4.5
6.1
4.1
15.66
6.15
10.05
9.75
16.38
6.95
12.51
10.9
12.52
9.55
17.96
10.44
11.52
10.24
9.2
7.8
12.85
13.1
17.55
18.85
15.65
13.65
10
8.48
11.24
11.12
17.18
11.6
9.84
11.92
13.92
17.24
16.84
20.24
19.44

## Sheet: P0 DT2
hCPL	FBS
0.84	1.7
1.06	1.78
0.86	1.45
1.08	1.58
0.81	1.25
1.06	1.45
0.86	1.52
1.04	1.02
0.76	1.48
0.99	1.01
1.08	1.44
0.97	1.12
1.05	1.28
1.2	1.31
1.01
1.53
1.49
1.62
1.18
1.15
1.15
1.16
1.11
1.13
1.1
1.15
0.95
0.87
0.97
1.33
1.02
1.42
1.09
1.26
1.27
1.34
0.83
1.15
1.22
0.82
1.24
0.8
0.98
0.99
0.96
0.98
1.04
1.03
1.03
1.02
1.13

## Sheet: P1 DT2
hCPL	FBS
1.65	4.02
1.77	2.94
1.87	2.89
1.98	4.67
3.05	3.82
1.87	5.63
1.72	4.24
2.55	1.7
1.89	2.22
1.09	1.21
2.88	1.41
2.03	2.21
1.99	1.84
2.38	2.6
1.45	1.79
3.72	1.96
3.4	1.37
1.89
0.97
2.08
1.81
1.97	5.21
0.94	4.19
2.14	3.99
1.07	3.3
1.03	2.22
1.08	1.92
1.03	4.52
1.02	1.86
1.28	30.17
1.13	2.44
1.25	1.75
1.31	1.73
1.48	2.09
1.19
1.31
1.15
1.19
1.14
1.13
1.35
1.91
1.61
1.14
1.03
1.38
1.34
1.41
1.31
1.18
1.22
1.26
1.26
1.14
1.7
1.3
1.7
1.21
2.02
1.09
1.85
1.18
1.73
2
2.26
1.8
2.11
1.95
2.3
2.18
2.88
1.4
1.87
1.26
1.43
1.59
1.3
1.25
1.38
2.12
3.4
3.74
4.18
2.93
3.07
8.36
2.59
2.36
2.3
2.58
2.16
1.03
2.17
1.99
1.21
2.49
1.27
1.35
1.24
1.41
1.21
1.32
1.75
1.17
1.27
2.4

## Sheet: P2 DT2
hCPL	FBS
1.5	6.29
2.33	3.06
2.82	1.66
1.48	5.99
1.76	2.84
2.36	8.54
1.36	12.46
1.82	2.89
2.45	8.28
1.92	1.78
2.09	1.27
2.46	1.78
2.21	1.78
2.19	2.38
2.01	3.02
3.23	2.55
2.68	1.76
3.93
1.76
1.53	7.43
2.4	3.07
2.44	4.37
1.74	5.14
2.86	2
1.92	2.83
1.16	10.6
1.1	1.6
1.23	5.27
1.68	2.34
1.18	2.17
1.13	2.03
1.19	2.21
1.87
2.02
1.63
1.62
1.45
1.18
1.26
1.33
3.01
1.62
1.43
1.73
1.46
1.7
1.82
1.68
1.58
1.7
1.72
1.61
1.64
1.48
1.49
1.51
1.59
1.43
1.51
1.42
1.44
1.42
1.57
2.05
1.93
1.7
1.86
2.12
3.66
1.38
2.55
1.4
1.81
1.32
1.68
1.44
1.91
1.11
1.88
1.59
2.85
3.79
3.54
2.46
2.43
2.76
1.77
2.32
2.55
1.43
2.2
1.97
1.66
2.33
1.47
1.52
1.8
1.17
1.62
1.25
1.8
1.09
1.02
3.09

## Sheet: P0 CFU
LPC	SVF
133	34
55	20
144	27
70	22
150	2
62	15
130	7
55	43
124	36
45	5
56	23
38	65
67	18.5
38	42
49
19
19
25
6
18
10
26
6
24
4
25
1
59
1
30
3
2
17
23
36
36
30
53
33
28
50
30
50
25
22
27
21
45
48.5
47.5
34.5
47.5

## Sheet: P1 CFU
hCPL	FBS
18	1
16	19
15	33
36	21
19	10
30	4
40	17
44	28
25	42
37	32
24	22
15	42.5
9	29.75
33	10
2	41.5
1	38.25
10	25.5
40
2
19
22
39
10
32
54
31	56
58	22
44
18
51	1
26	18
47	20
35	29
37	35.5
40
38.25
31.5
32.25
34.25
24.25
42
34
42
50
43.5
45.5
36
47
36.75
38.25
50
31
38
27
38
46
41
36
14
47
3
1
13
10
1
4
12
17
15
8
40
9
4
29
1
39
34
22
29
45
28
24
25
20
12.5

## Sheet: P2 CFU
hCPL	FBS
25	19
41
41
37	8
50	28
35	19
70	21
41	30
21
25
1	25
5	1
15	28
6	41
9	33
2	39
15	25
23	20.5
9	45.5
34	54.75
14
8
33
12
30
32
19
43
31
39.5
25
31
30.5
17
12
7
6
10
9
10
24
20
9
9
34
34
26
0
3
20
10
15
23
40.5
43
39.5
36
17
24.25
29.25
40.5
41
19.5
28.5
19.5
21.5
19.5
31.5
26
24
12
7
6
10
9
10
24
20
9
9
34
34
26
0
3
20
10
15
23
40.5
43
39.5
36
17
24.25
29.25
40.5
41
19.5
28.5
19.5
21.5
19.5
31.5
26
24
