# Supplementary material for: Quality assessment of a serum and xenofree medium for the expansion of human GMP-grade mesenchymal stromal cells
Source: PeerJ. 2022 May 30;10:e13391. doi: 10.7717/peerj.13391 (PMC9161815; doi:10.7717/peerj.13391)
Supplement: Supplemental Information 2 — Viability is expressed as a percentage of viable cells among total cells, from passage 0 (P0) to passage 2 (P2). BM-MSC: bone marrow Mesenchymal Stromal Cells; Ad-MSC: adipose derived Mesenchymal Stromal Cells; hCPL: human Concentrate Platelet Lysate; SXFM: serum and Xeno-free Media. [file peerj-10-13391-s002.xlsx]

## Sheet: VIABILITE
				Viability (%)
			P0			P1			P2
	BM-MSC		hCPL	SXFM		hCPL	SXFM		hCPL	SXFM
	1		100	98.8		99.18	100		98.2456	96.6102
	2		98.08	97.62		94.24	97.01		94.3925	94.4056
	3		90.2813	93.5714		92	91.22		83.105	92.9204
	4		98.92	96.73		96.07	92.53		98.5994	100
		mean	96.8203	96.6804		95.3725	95.19		93.5857	95.984
	Ad-MSC
	1		98.21	94.59		97.96	96.32		96.63	90.34
	2		96.95	95.18		100	99.46		96.1538	96.9697
	3		98.1366	94.2857		96.5714	94.2584		92.3077	93.1034
	4		94.016	90.7942		92.1986	90.8642		94.6296	96.9101
		mean	96.8282	93.7125		96.6825	95.2256		94.9303	94.3308
